# Supplementary material for: A Comparative Study of Molybdenum Carbonyl and Oxomolybdenum Derivatives Bearing 1,2,3-Triazole or 1,2,4-Triazole in Catalytic Olefin Epoxidation
Source: MDPI journal article supplement (doi:10.3390/molecules24010105), 2018-12-28
Supplement: s1 [file s1]

## **Supporting Information**

Article for *Molecules*

### **A comparative study of molybdenum carbonyl and oxomolybdenum derivatives bearing 1,2,3-triazole or 1,2,4-triazole in catalytic olefin epoxidation**

**Lucie S. Nogueira, Patrícia Neves, Ana C. Gomes, Tatiana A. Amarante, Filipe A. Almeida Paz, Anabela A. Valente \*, Isabel S. Gonçalves, Martyn Pillinger \***

Department of Chemistry, CICECO – Aveiro Institute of Materials, University of Aveiro, Campus Universitário de Santiago, 3810-193 Aveiro, Portugal;

lucienogueira@ua.pt (L.S.N.); pneves@ua.pt (P.N.); agomes1@ua.pt (A.C.G.);  
tatiana.amarante@ua.pt (T.A.A.); filipe.paz@ua.pt (F.A.A.P.); atav@ua.pt (A.A.V.);  
igoncalves@ua.pt (I.S.G.); mpillinger@ua.pt (M.P.)

\* Correspondence: atav@ua.pt (A.A.V.), mpillinger@ua.pt (M.P.); Tel.: +351-234-370603

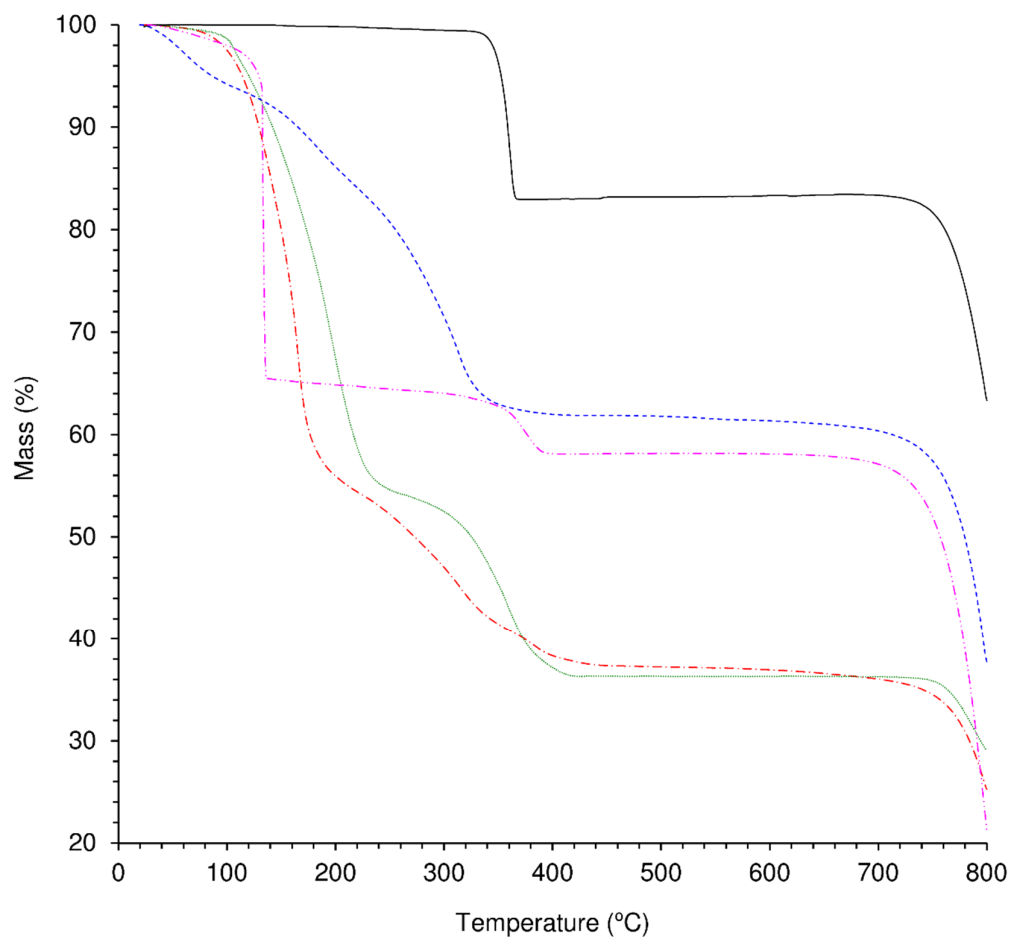

**Figure S1.** TGA curves for  $[\text{Mo}(\text{CO})_3(1,2,3\text{-trz})_3]$  (**1**) ( $\cdot - \cdot - \cdot$ ),  $[\text{Mo}(\text{CO})_3(1,2,4\text{-trz})_3]$  (**2**) ( $\cdots$ ), **1<sup>OD</sup>** ( $- - -$ ),  $[\text{MoO}_3(1,2,3\text{-trz})_{0.5}]$  (**3**) ( $\text{—}$ ), and  $(\text{NH}_4)_{1.8}(\text{H}_3\text{O})_{0.2}[\text{Mo}_2\text{O}_2(\mu_2\text{-O})(\text{O}_2)_4(1,2,4\text{-trz})]\cdot\text{H}_2\text{O}$  (**5**) ( $\cdot \cdots \cdot$ ).

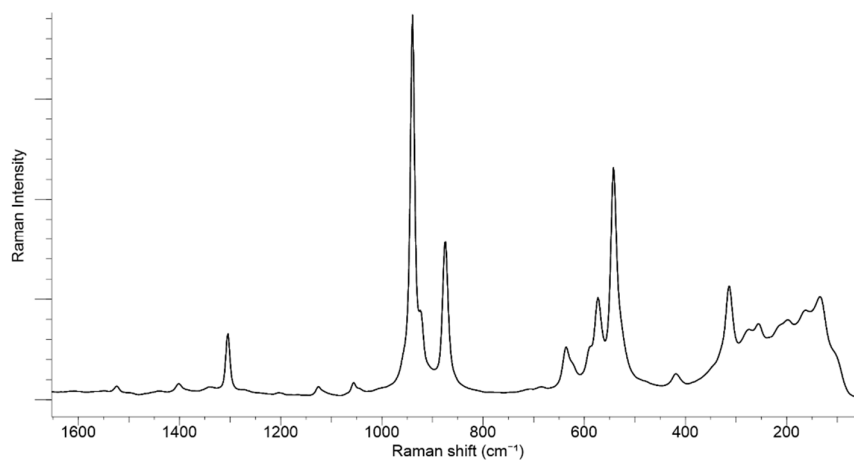

**Figure S2.** Raman spectrum in the range of 100-1600  $\text{cm}^{-1}$  of  $(\text{NH}_4)_{1.8}(\text{H}_3\text{O})_{0.2}[\text{Mo}_2\text{O}_2(\mu_2\text{-O})(\text{O}_2)_4(1,2,4\text{-trz})]\cdot\text{H}_2\text{O}$  (**5**).

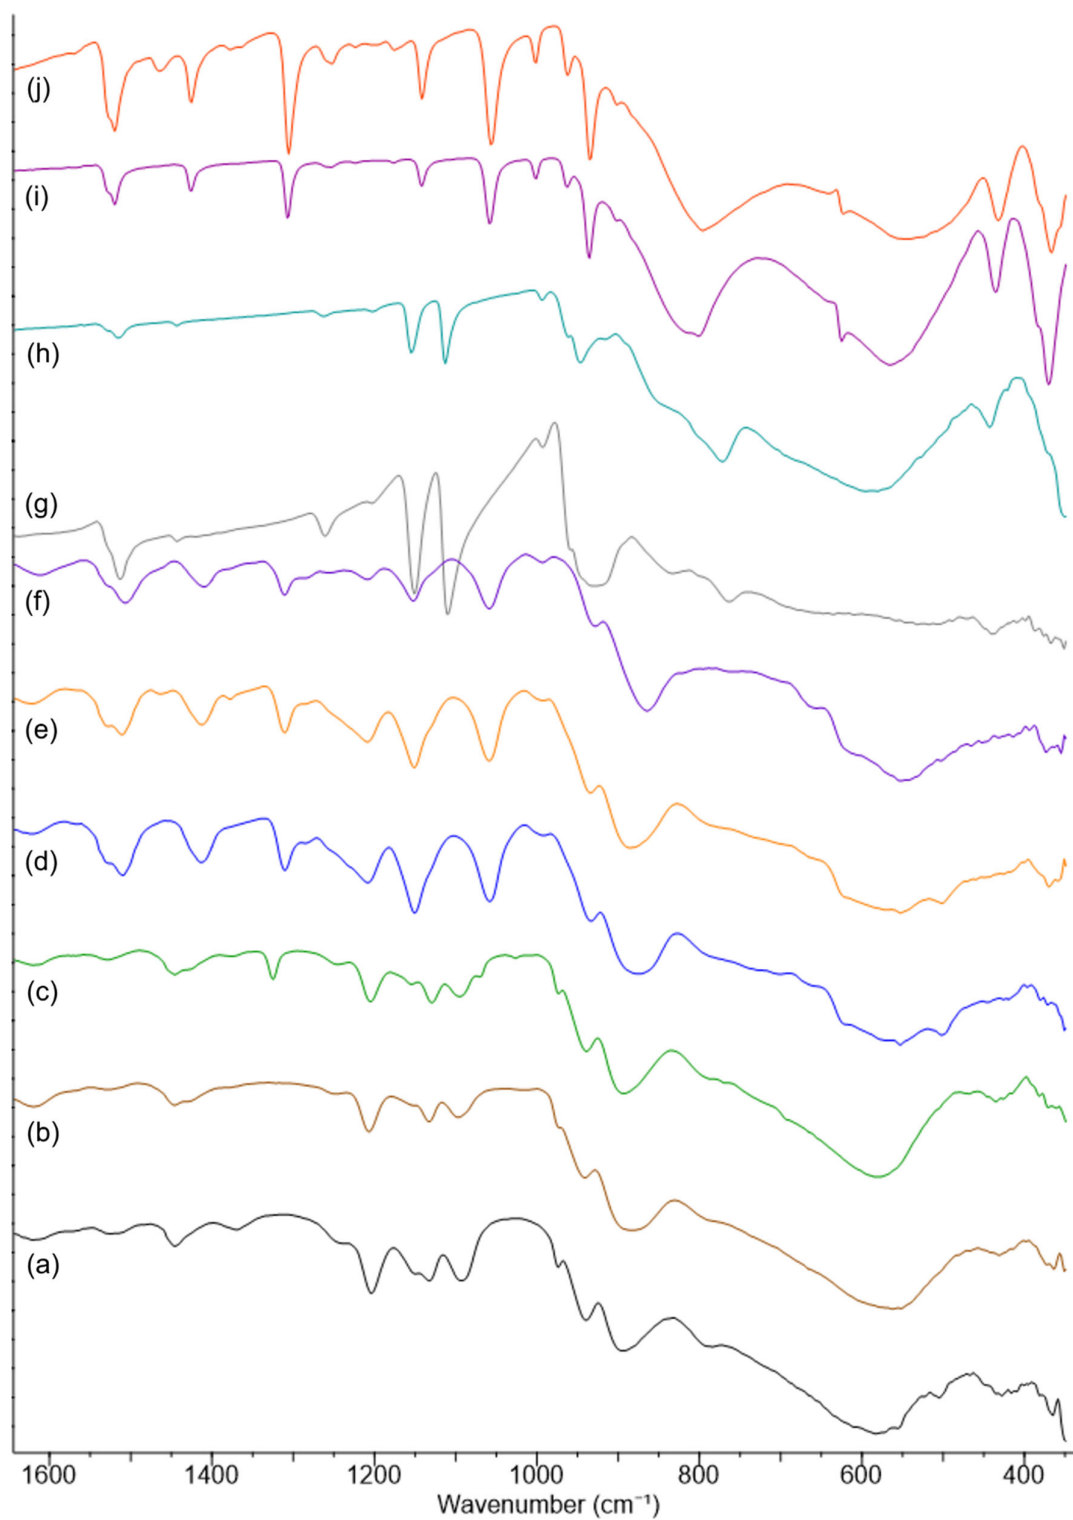

**Figure S3.** ATR FT-IR spectra in the range of 350-1600 cm<sup>-1</sup> of (a) **1**<sup>OD</sup>, (b) recovered solid **1**<sup>ODr</sup>, (c) recovered solid **1**<sup>r</sup>, (d) **2**<sup>OD</sup>, (e) recovered solid **2**<sup>ODr</sup>, (f) recovered solid **2**<sup>r</sup>, (g) hybrid **3**, (h) recovered solid **3**<sup>r</sup>, (i) hybrid **4**, and (j) recovered solid **4**<sup>r</sup>.

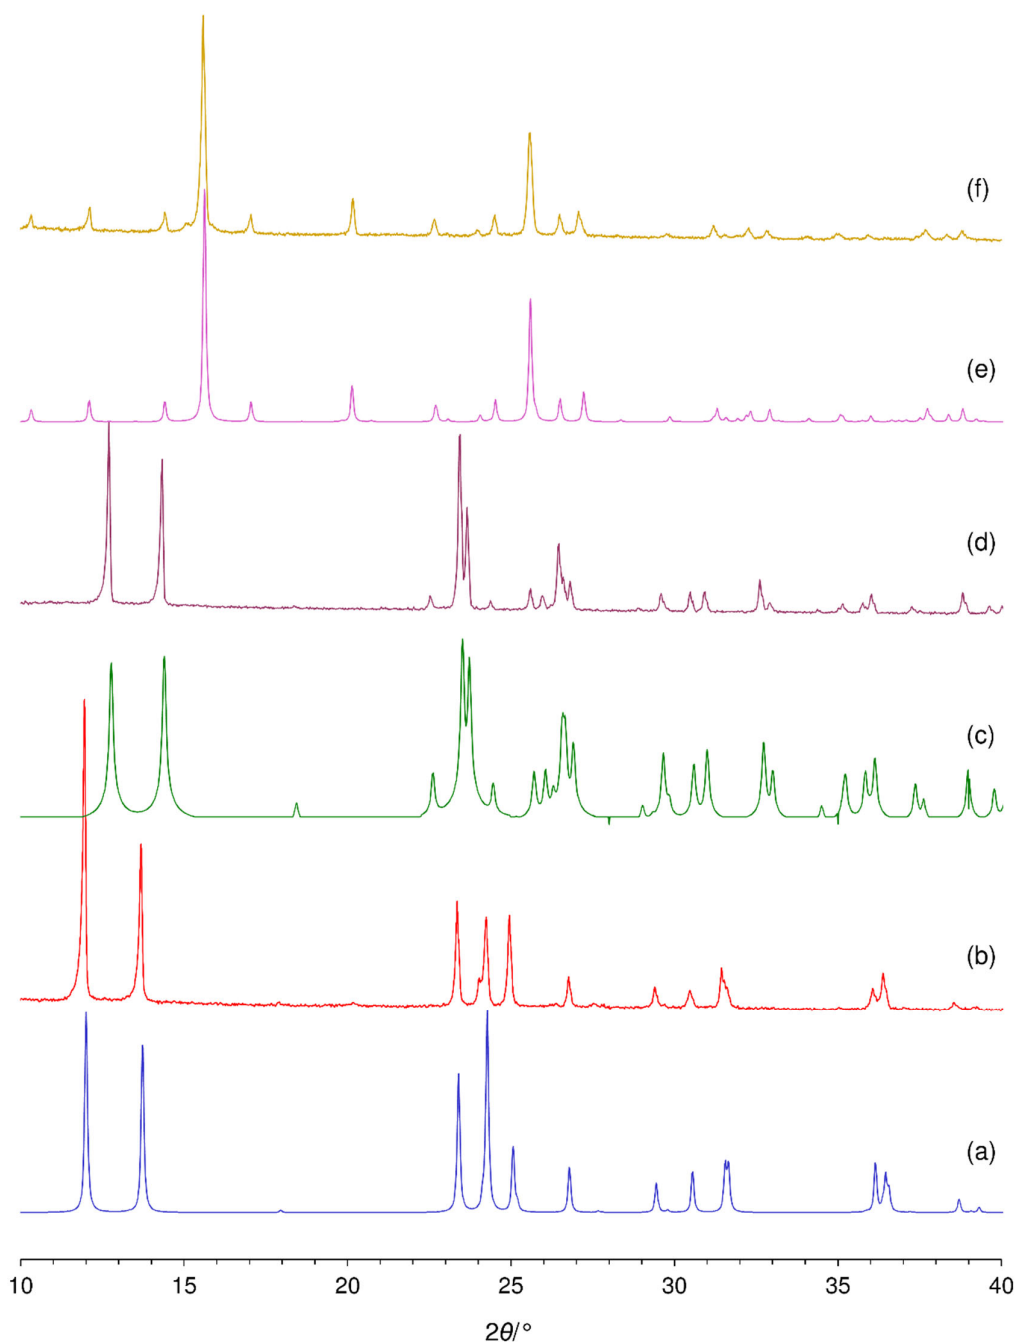

**Figure S4.** Computed (a,c,e) and experimental (b,d,f) PXRd patterns of (a,b)  $[\text{MoO}_3(1,2,3\text{-trz})_{0.5}]$  (**3**), (c,d)  $[\text{MoO}_3(1,2,4\text{-trz})_{0.5}]$  (**4**), and (e,f)  $(\text{NH}_4)_{1.8}(\text{H}_3\text{O})_{0.2}[\text{Mo}_2\text{O}_2(\mu_2\text{-O})(\text{O}_2)_4(1,2,4\text{-trz})] \cdot \text{H}_2\text{O}$  (**5**). The program Mercury (copyright CCDC, ver. 3.9) [S1] was used to generate the computed patterns from the crystal structure data published for **3** [S2] and **4** [S3], and the data reported in this paper for **5**.

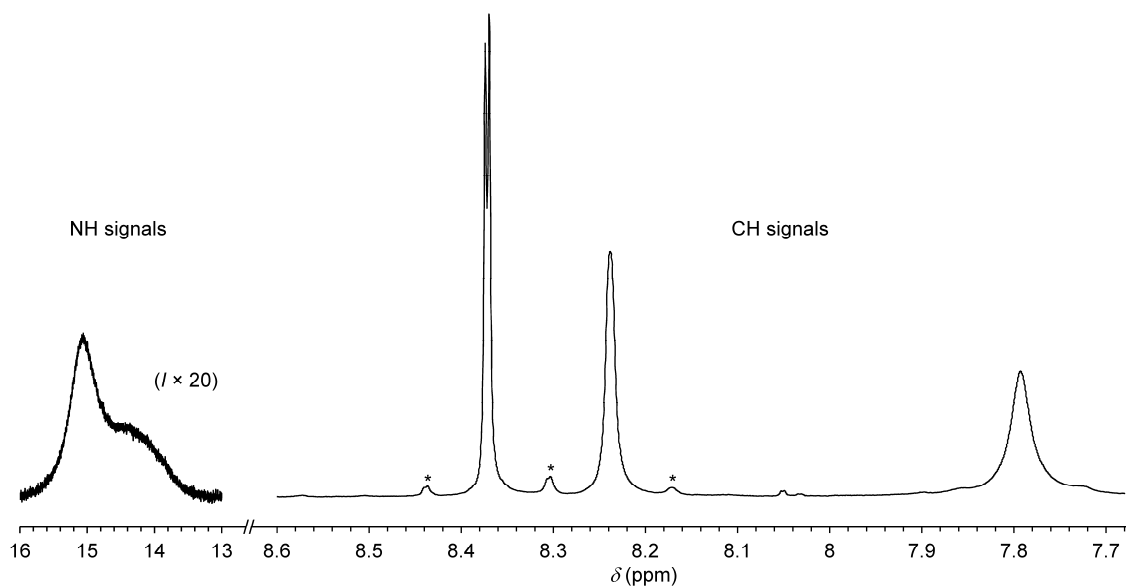

**Figure S5.** Regions of the  $^1\text{H}$  NMR spectrum of **1** in  $(\text{CD}_3)_2\text{CO}$  containing signals due to 1,2,3-trz NH and CH protons. The asterisks denote spinning sidebands.

**Table S1.** Bond distances ( $\text{\AA}$ ) and angles ( $^\circ$ ) for the crystallographically independent  $\text{Mo}^{\text{VI}}$  center present in  $(\text{NH}_4)_{1.8}[(\text{H}_3\text{O})_{0.2}[\text{Mo}_2\text{O}_2(\mu_2\text{-O})(\text{O}_2)_4(1,2,4\text{-trz})] \cdot \text{H}_2\text{O}$  (**5**).

|        |          |           |          |
|--------|----------|-----------|----------|
| Mo1–O1 | 1.944(3) | O1–Mo1–O3 | 86.9(4)  |
| Mo1–O2 | 1.700(6) | O1–Mo1–O6 | 88.3(3)  |
| Mo1–O3 | 1.951(6) | O1–Mo1–N1 | 80.0(3)  |
| Mo1–O4 | 1.933(7) | O2–Mo1–O1 | 98.1(3)  |
| Mo1–O5 | 1.941(6) | O2–Mo1–O3 | 101.5(3) |
| Mo1–O6 | 1.958(6) | O2–Mo1–O4 | 101.1(3) |
| Mo1–N1 | 2.398(9) | O2–Mo1–O5 | 100.5(3) |
|        |          | O2–Mo1–O6 | 101.2(3) |
|        |          | O2–Mo1–N1 | 178.0(3) |
|        |          | O3–Mo1–O6 | 157.3(3) |
|        |          | O3–Mo1–N1 | 78.8(3)  |
|        |          | O4–Mo1–O1 | 130.2(4) |
|        |          | O4–Mo1–O3 | 44.4(3)  |
|        |          | O4–Mo1–O5 | 89.2(3)  |
|        |          | O4–Mo1–O6 | 131.1(3) |
|        |          | O4–Mo1–N1 | 80.4(3)  |
|        |          | O5–Mo1–O1 | 131.4(4) |
|        |          | O5–Mo1–O3 | 131.6(3) |
|        |          | O5–Mo1–O6 | 44.1(3)  |
|        |          | O5–Mo1–N1 | 80.7(3)  |
|        |          | O6–Mo1–N1 | 78.6(3)  |

## References

- [S1] C. F. Macrae, I. J. Bruno, J. A. Chisholm, P. R. Edgington, P. McCabe, E. Pidcock, L. Rodriguez-Monge, R. Taylor, J. van de Streek, P. A. Wood, *J. Appl. Crystallogr.* **2008**, *41*, 466-470.
- [S2] T. R. Amarante, P. Neves, A. A. Valente, F. A. A. Paz, M. Pillinger, I. S. Gonçalves, *J. Catal.* **2016**, *340*, 354-367.
- [S3] J. Chuang, W. Oullette, J. Zubieta, *Inorg. Chim. Acta* **2008**, *361*, 2357-2364.
